# Supplementary material for: Multiple 3D-QSAR modeling, e-pharmacophore, molecular docking, and in vitro study to explore novel AChE inhibitors
Source: Royal Society of Chemistry journal article supplement (doi:10.1039/c8ra08198k), 2018-01-01
Supplement: c8ra08198k1.pdf [file c8ra08198k1.pdf]

## Supplementary Material

# Multiple 3D-QSAR modeling, e-pharmacophore, molecular docking, and *in vitro* study to explore novel AChE inhibitors

Srabanti Jana, Ankit Ganeshpurkar, and Sushil Kumar Singh\*

Pharmaceutical Chemistry Research Laboratory, Department of Pharmaceutical Engineering & Technology, Indian Institute of Technology (Banaras Hindu University), Varanasi-221005, India.

\*Corresponding Author:

Phone: +91-542-6702736/49; fax: +91-542-2368428; e-mail: sksingh.phe@iitbhu.ac.in.

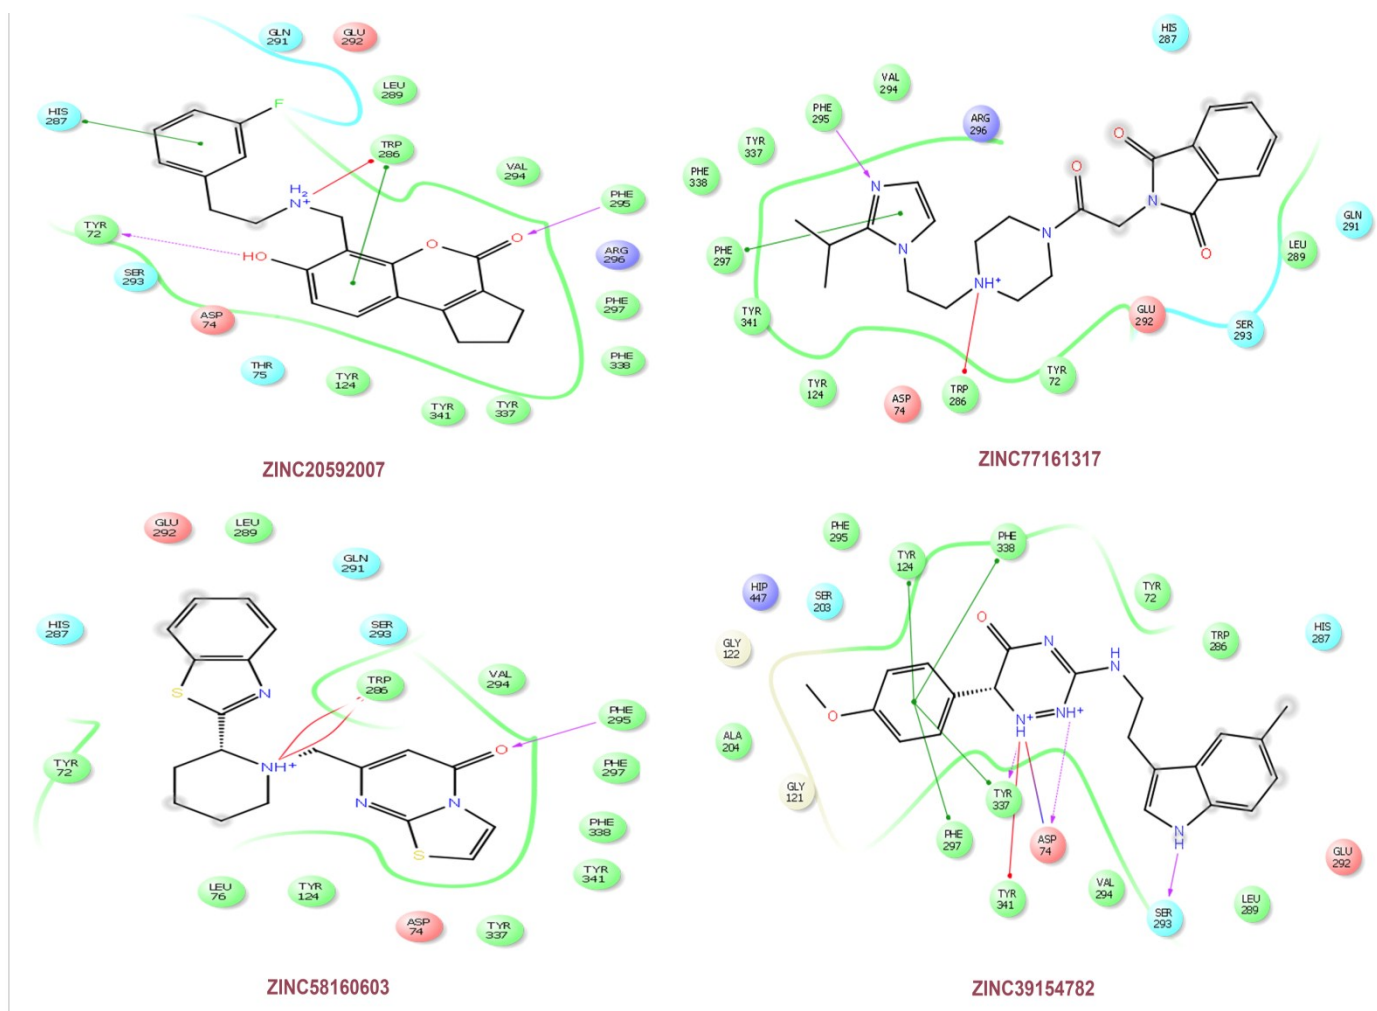

Figure S 1. Docking pose of ZINC72451013, ZINC20649934, ZINC05354646, and ZINC79331983 with 4MOE crystal structure using AutoDock.

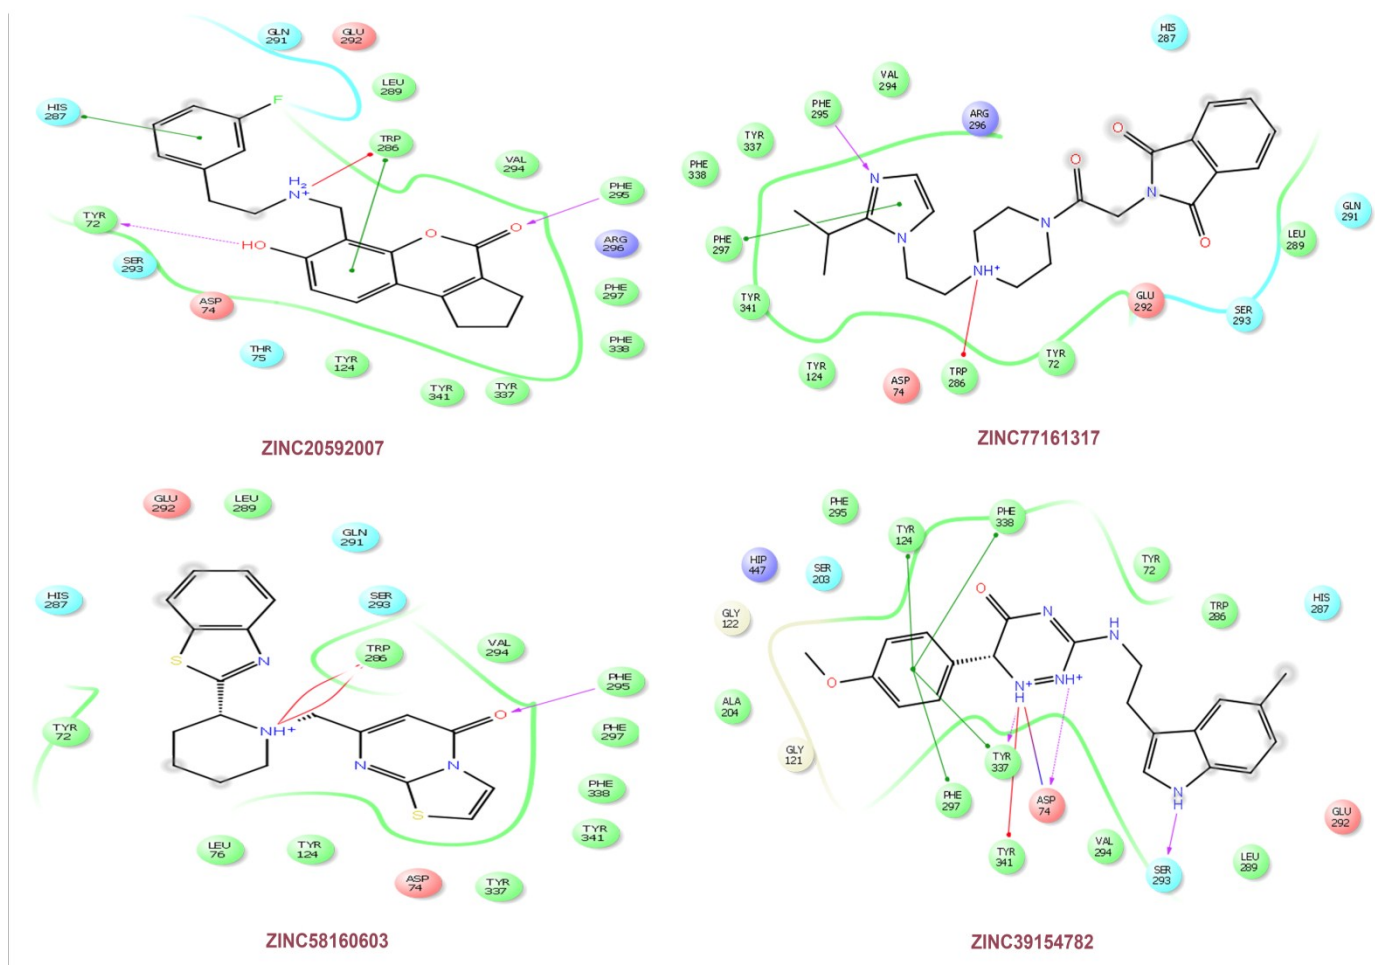

Figure S 2. Docking pose of ZINC20592007, ZINC77161317, ZINC58160603, and ZINC39154782 with 4M0E crystal structure using AutoDock

Table S 1. Final hits outcome from respective pharmacophore models.

| Hits                                         | Pharmacophore model |
|----------------------------------------------|---------------------|
| ZINC72451013, and ZINC20649934               | 4M0F                |
| ZINC05354646, and ZINC20592007               | 4M0E                |
| ZINC79331983, ZINC58160603, and ZINC39154782 | 3D-QSAR             |
| ZINC77161317                                 | 4EY7                |

**Table S 2.** Calculated DFT properties of hit molecules.

| Hits         | HOMO     | LUMO   | HOMO-LUMO gap | ESP mean(kcal/mol) |
|--------------|----------|--------|---------------|--------------------|
| ZINC72451013 | -0.205   | -0.069 | -0.137        | -0.13              |
| ZINC20649934 | -0.229   | -0.079 | -0.150        | 1.38               |
| ZINC05354646 | -0.21455 | -0.047 | -0.168        | 1.51               |
| ZINC79331983 | -0.199   | -0.021 | -0.177        | 1.88               |
| ZINC20592007 | -0.218   | -0.048 | -0.171        | 0.96               |
| ZINC77161317 | -0.214   | -0.078 | -0.136        | 1.12               |
| ZINC58160603 | -0.222   | -0.054 | -0.168        | -0.07              |
| ZINC39154782 | -0.20    | -0.094 | -0.105        | -0.22              |

**Table S 3.** Hits with Glide energy and docking score against crystal of BuChE with AChE

| Compounds    | Docking score (AChE) | Docking score (BuChE) | Glide energy (BuChE) |
|--------------|----------------------|-----------------------|----------------------|
| ZINC72451013 | -12.87               | -6.52                 | -39.459              |
| ZINC20649934 | -12.65               | -5.85                 | -39.436              |
| ZINC05354646 | -11.93               | -5.66                 | -30.077              |
| ZINC79331983 | -11.40               | -8.78                 | -46.851              |
| ZINC20592007 | -11.26               | -8.5                  | -42.257              |
| ZINC77161317 | -11.02               | -7.31                 | -52.366              |
| ZINC58160603 | -10.93               | -7.35                 | -49.362              |
| ZINC39154782 | -10.74               | -9.34                 | -53.435              |

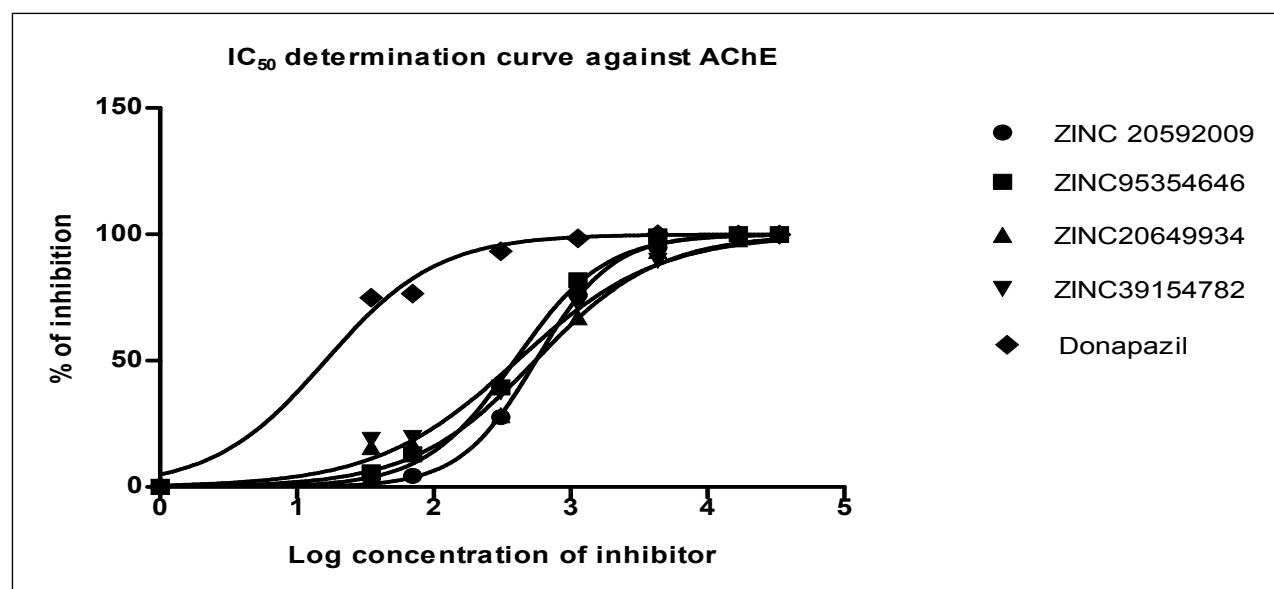**Figure S3.** Dose response curve of selected hits with donepezil

**Table S 4.** The  $V_{max}$  and  $K_m$  values of selected hits at various concentrations

| Conc of ZINC 20592009 | 0 $\mu$ M | 0.25 $\mu$ M | 0.5 $\mu$ M | 1 $\mu$ M |
|-----------------------|-----------|--------------|-------------|-----------|
| $V_{max}$             | 0.003854  | 0.02164      | 0.01371     | 0.01009   |
| $K_m$                 | 0.8966    | 1.352        | 0.9819      | 1.119     |
| Conc of ZINC95354646  | 0 $\mu$ M | 0.25 $\mu$ M | 0.5 $\mu$ M | 1 $\mu$ M |
| $V_{max}$             | 0.003854  | 0.0184       | 0.01514     | 0.01218   |
| $K_m$                 | 0.8966    | 0.8523       | 0.7853      | 0.898     |
| Conc of ZINC20649934  | 0 $\mu$ M | 0.5 $\mu$ M  | 1 $\mu$ M   | 2 $\mu$ M |
| $V_{max}$             | 0.003879  | 0.03073      | 0.02251     | 0.01666   |
| $K_m$                 | 0.9066    | 1.31         | 1.034       | 1.268     |
| Conc of ZINC39154782  | 0 $\mu$ M | 0.5 $\mu$ M  | 1 $\mu$ M   | 2 $\mu$ M |
| $V_{max}$             | 0.003854  | 0.03091      | 0.02595     | 0.01913   |
| $K_m$                 | 0.8966    | 1.692        | 1.577       | 1.537     |

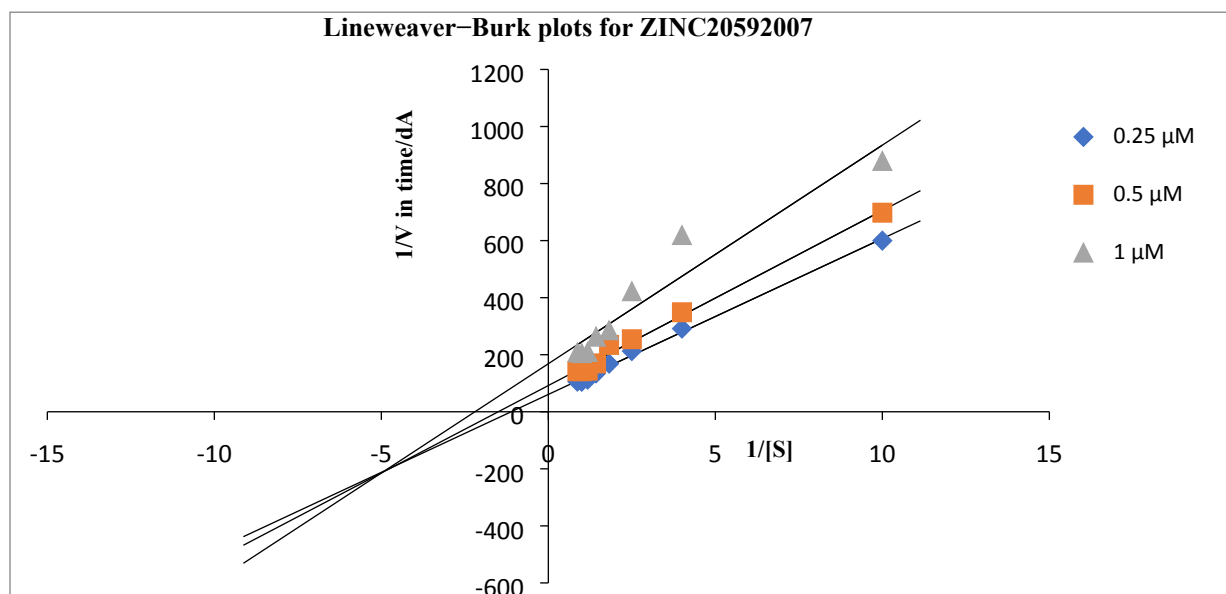

**Figure S4.** Lineweaver-Burk plots from the substrate-velocity curves of AChE activity with different substrate concentrations (0.15-1.15 $\mu$ M) in the absence and presence of 0.25, 0.5 and 1  $\mu$ M ZINC20592007

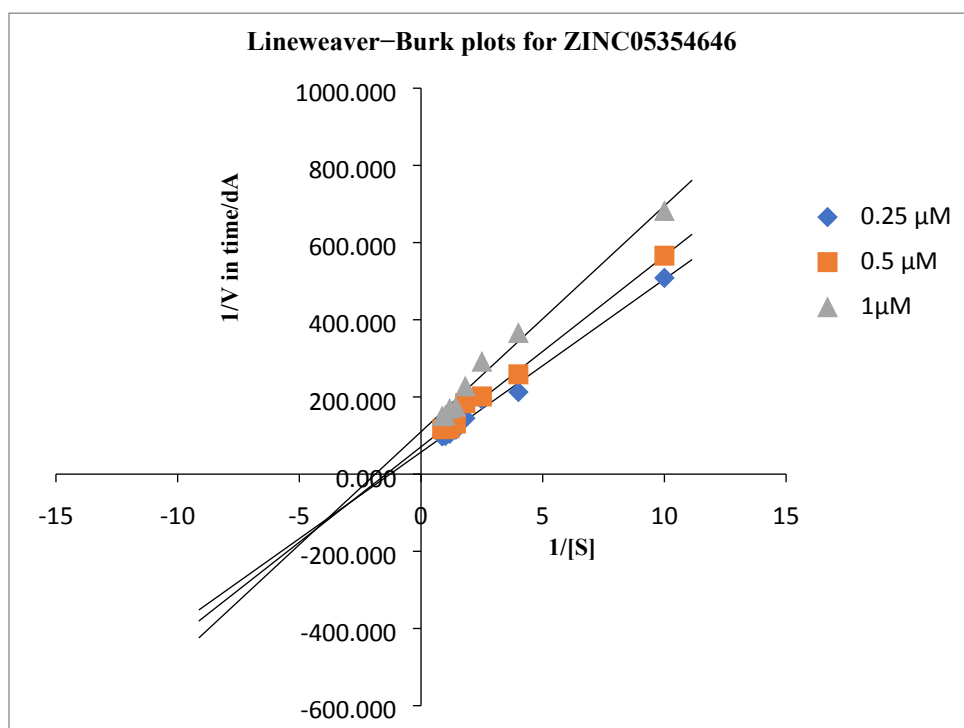

**Figure S5.** Lineweaver-Burk plots from the substrate-velocity curves of AChE activity with different substrate concentrations (0.15-1.15 $\mu\text{M}$ ) in the absence and presence of 0.25, 0.5 and 1  $\mu\text{M}$  ZINC05354646

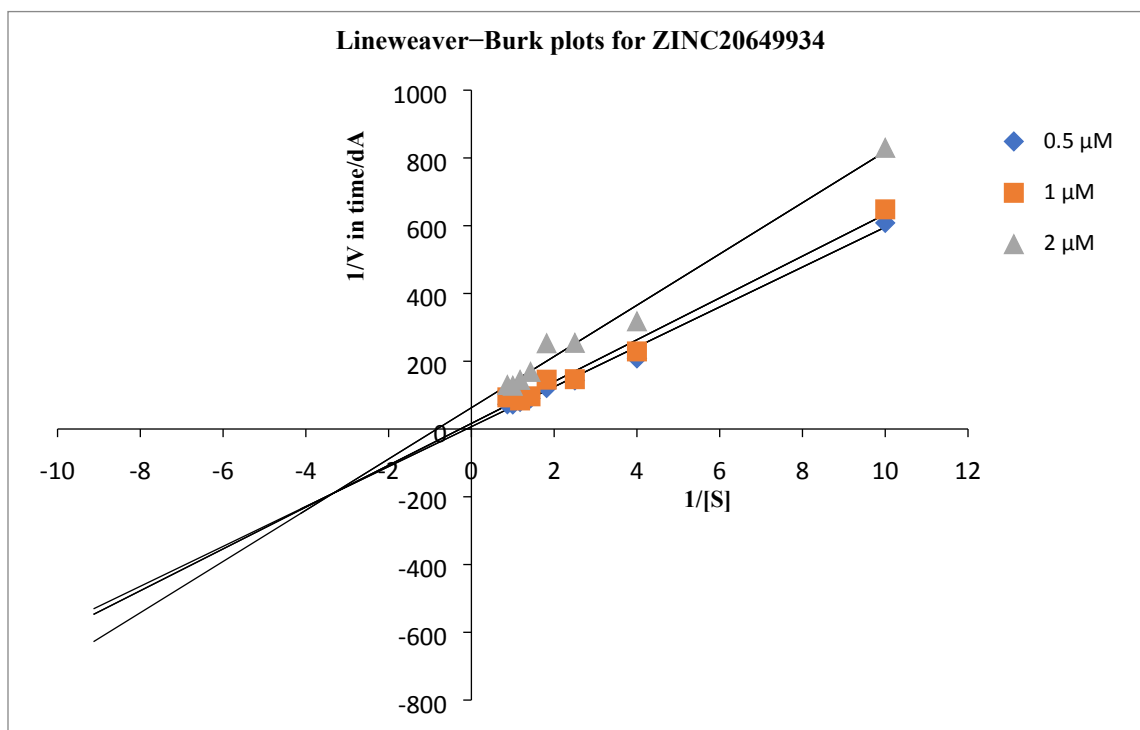

**Figure S6.** Lineweaver-Burk plots from the substrate-velocity curves of AChE activity with different substrate concentrations (0.15-1.15 $\mu\text{M}$ ) in the absence and presence of 0.5, 1 and 2  $\mu\text{M}$  of ZINC20649934

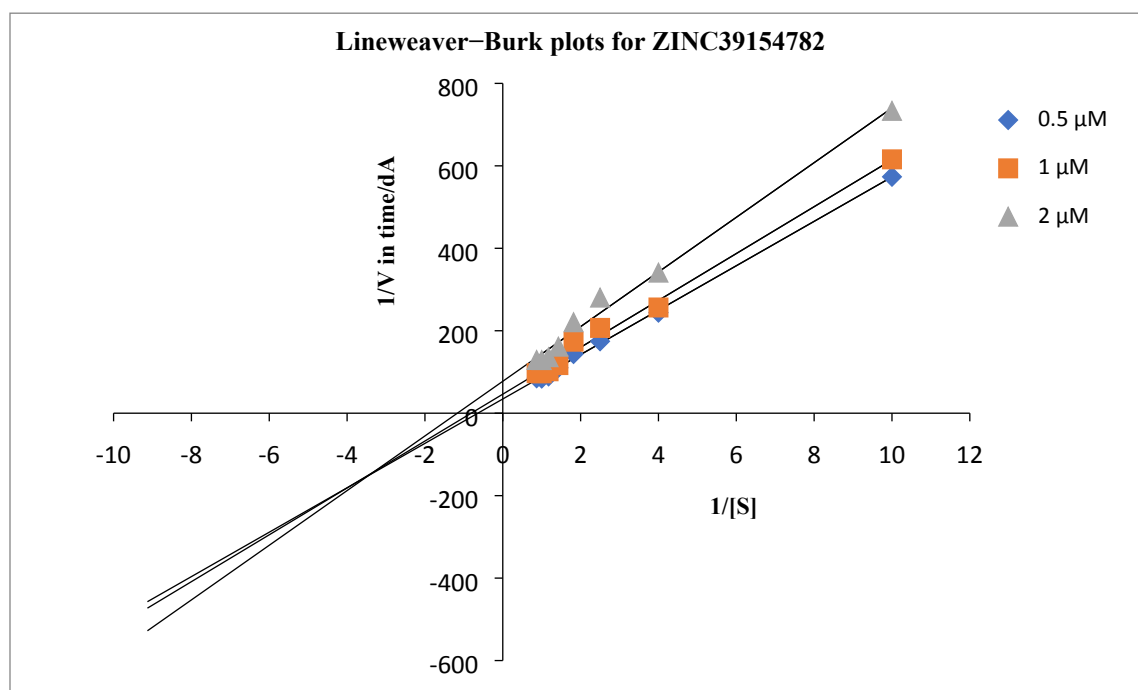

**Figure S7.** Lineweaver–Burk plots from the substrate-velocity curves of AChE activity with different substrate concentrations (0.15–1.15 $\mu\text{M}$ ) in the absence and presence of 0.5, 1 and 2  $\mu\text{M}$  of ZINC39154782

**Table S 5.** Permeability ( $\text{Pe } 10^{-6} \text{ cm s}^{-1}$ ) of nine commercial drugs in the PAMPA-BBB assay used for the validation of the experiment

| Commercial drugs | Reference value $\text{Pe } (10^{-6})^a$ | Experimental value $\text{Pe } (10^{-6})^b$ |
|------------------|------------------------------------------|---------------------------------------------|
| Verapamil        | 16                                       | 20.81 $\pm$ 1.2                             |
| Diazepam         | 16                                       | 19.9 $\pm$ 0.5                              |
| Progesterone     | 9.3                                      | 15.79 $\pm$ 1.4                             |
| Atenolol         | 0.8                                      | 0.68 $\pm$ 0.4                              |
| Dopamine         | 0.2                                      | 0.17 $\pm$ 0.1                              |
| Lomefloxacin     | 1.1                                      | 0.31 $\pm$ 0.3                              |
| Alprazolam       | 5.4                                      | 4.6 $\pm$ 0.7                               |
| Chlorpromazine   | 6.5                                      | 5.9 $\pm$ 0.6                               |
| Oxazepam         | 10                                       | 8.7 $\pm$ 1.1                               |

<sup>a</sup>Taken from literature. <sup>b</sup>Data are expressed as mean  $\pm$  SEM of three independent experiments.

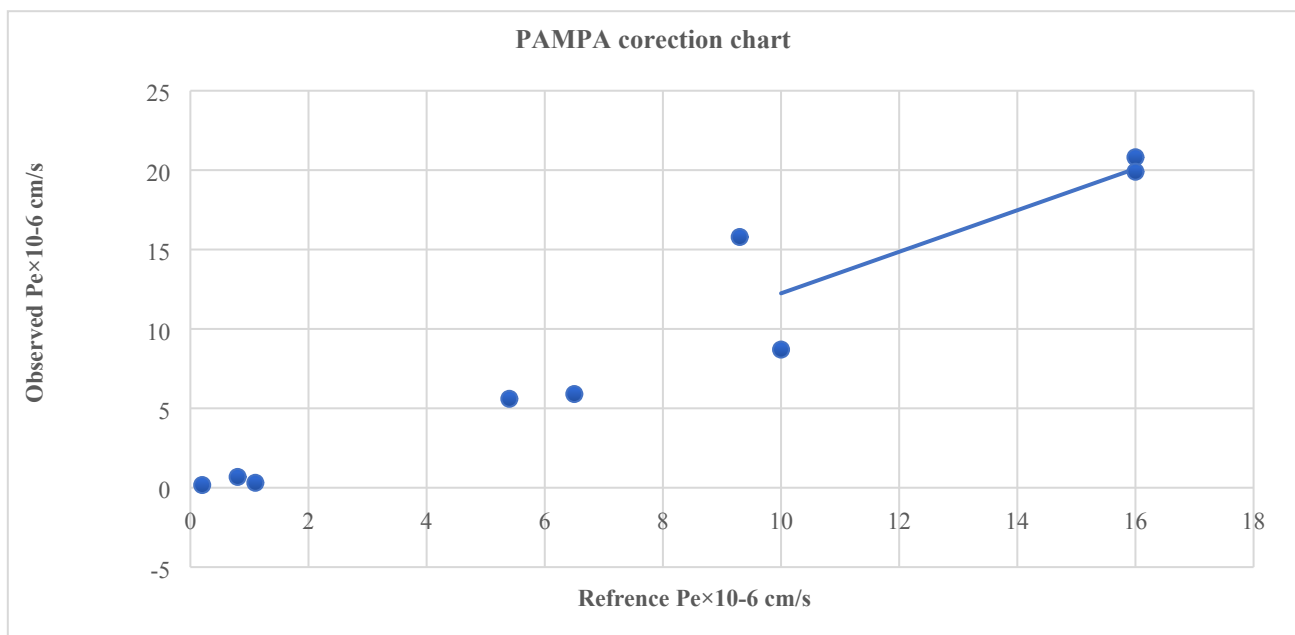

**Figure S8.** Linear correlation between experimental and reported permeability of nine commercial drugs using PAMPA-BBB assay.

**Table S 6.** Ranges of permeability ( $Pe$ ,  $10^{-6} \text{ cm s}^{-1}$ ) of PAMPA-BBB assay using equation [ $Pe(\text{exp}) = 1.308Pe(\text{ref}) + 0.839$  ( $R^2 = 0.931$ )] and literature

| Permeability prediction in PBS                 | Permeability ( $Pe$ , $10^{-6} \text{ cm s}^{-1}$ ) |
|------------------------------------------------|-----------------------------------------------------|
| Compounds of high BBB permeation (CNS+)        | $Pe(\text{exp}) > 4.39$                             |
| Compounds of uncertain BBB permeation (CNS+/-) | $4.39 > Pe(\text{exp}) > 1.78$                      |
| Compounds of low BBB permeation (CNS-)         | $Pe(\text{exp}) < 1.78$                             |





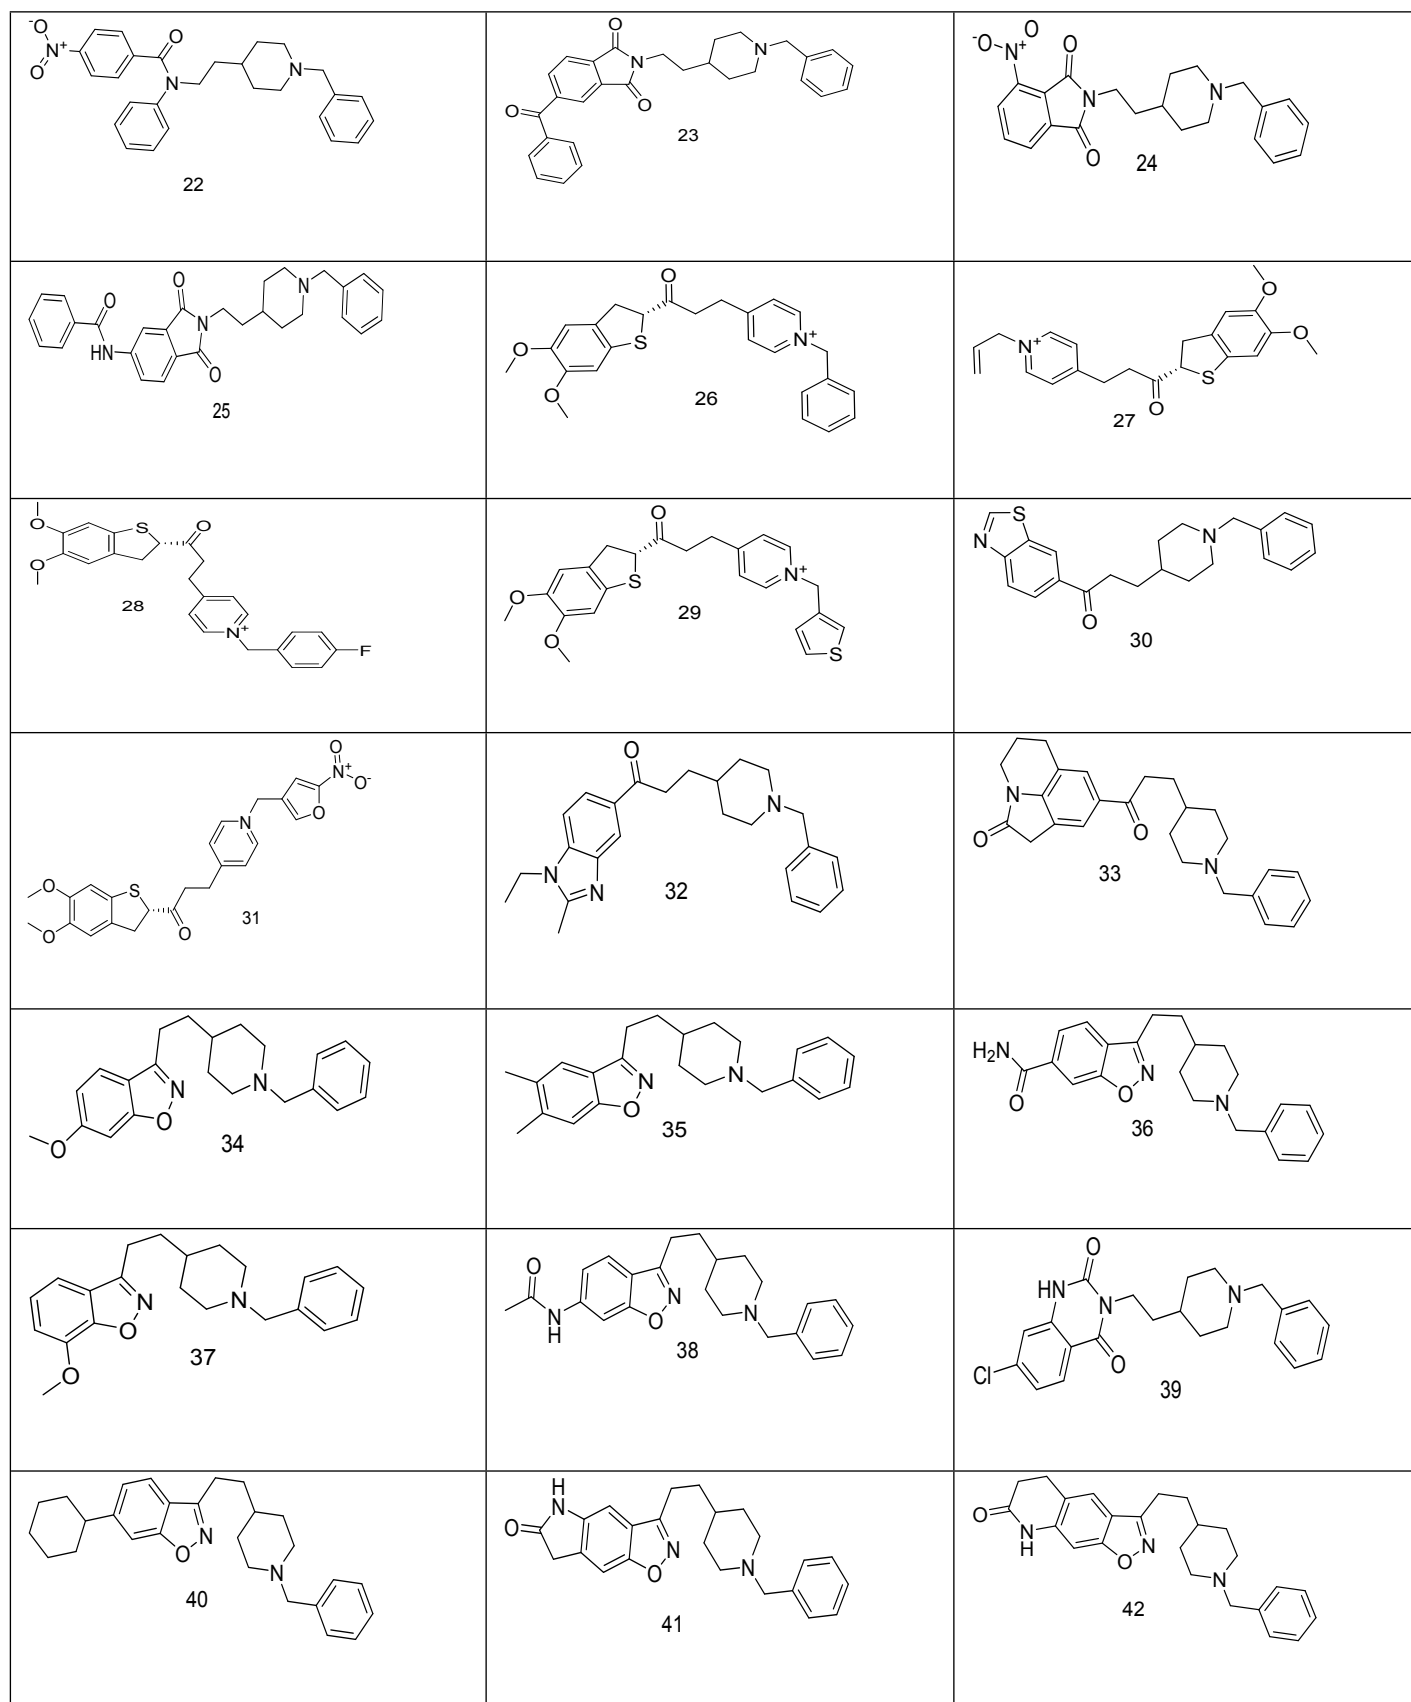

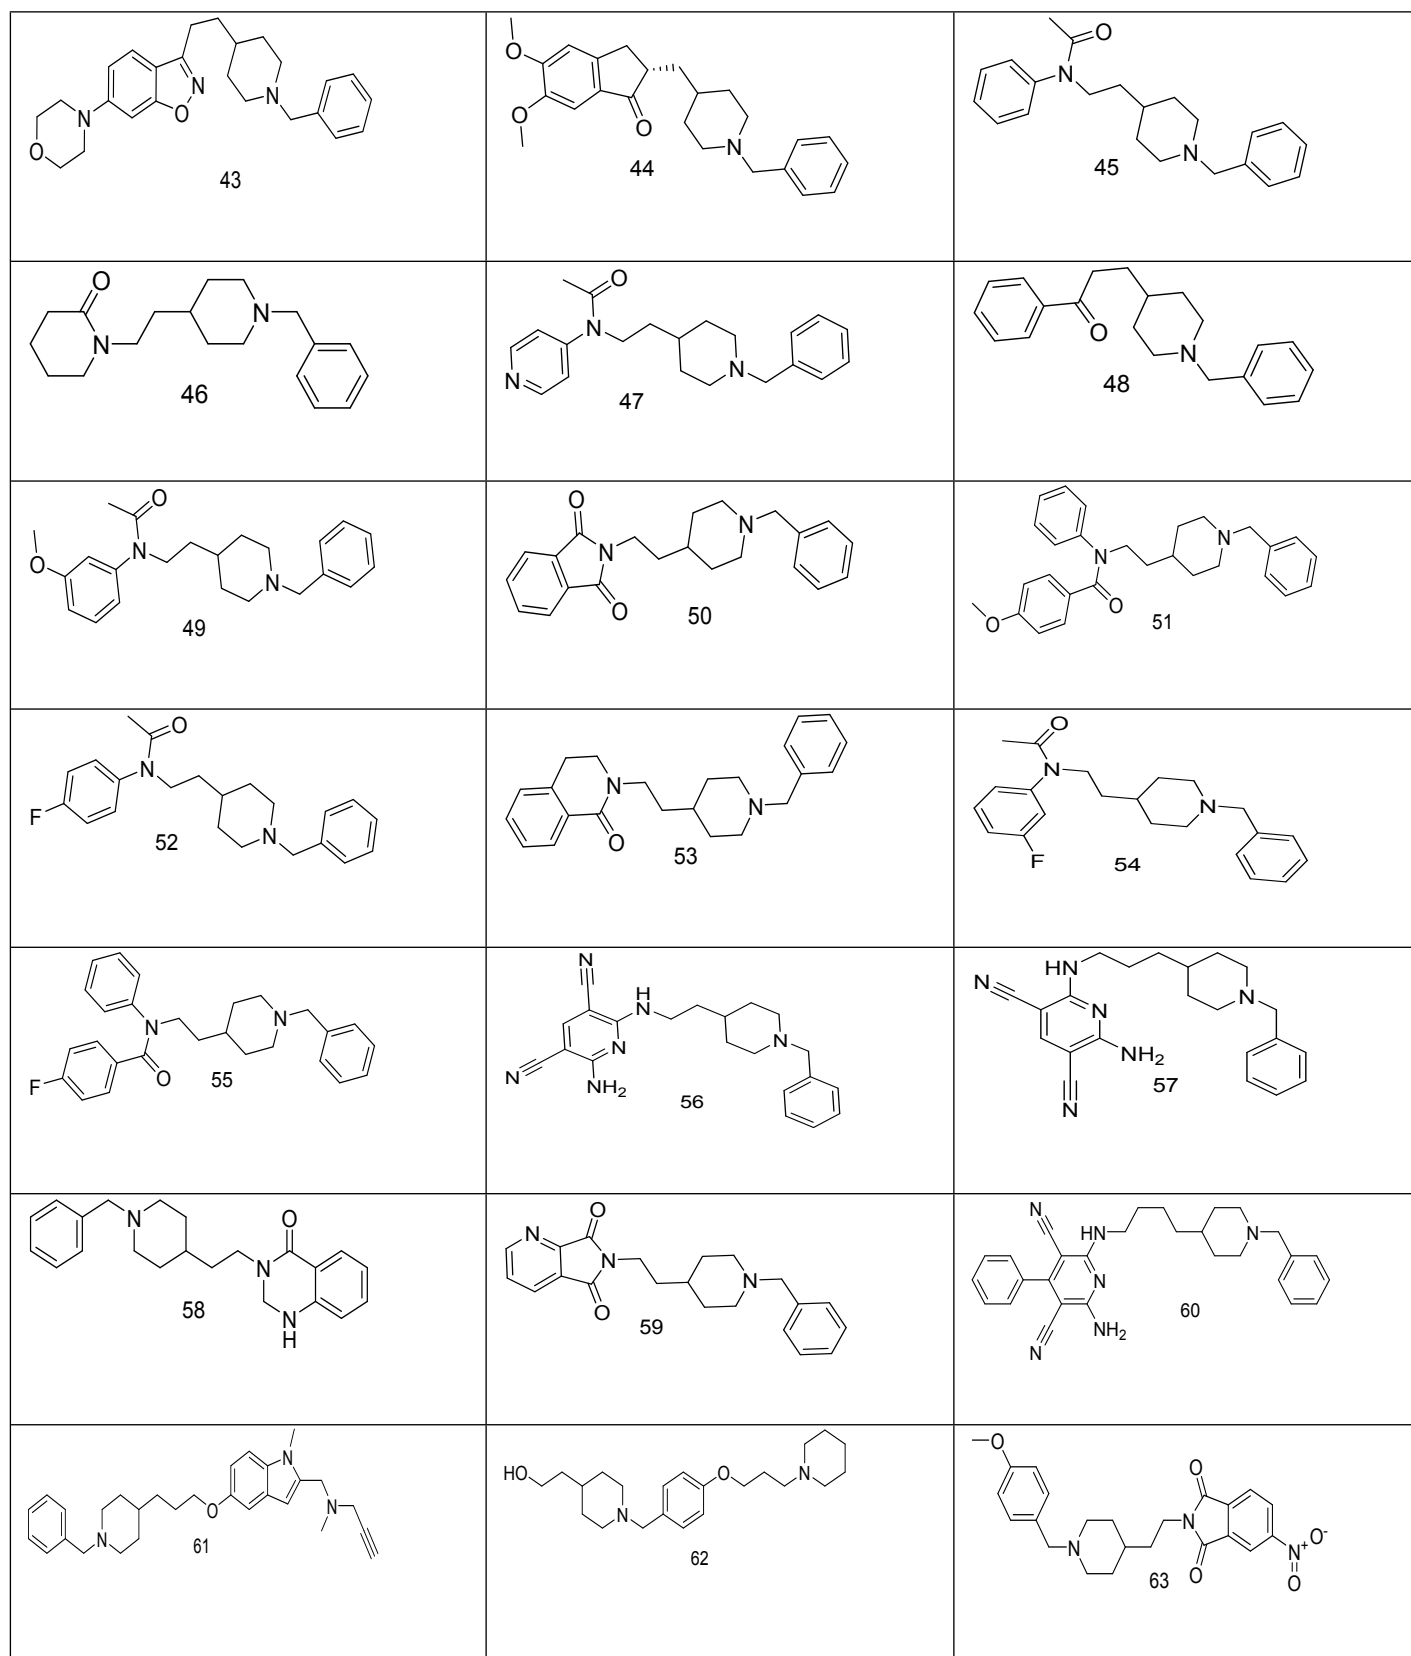

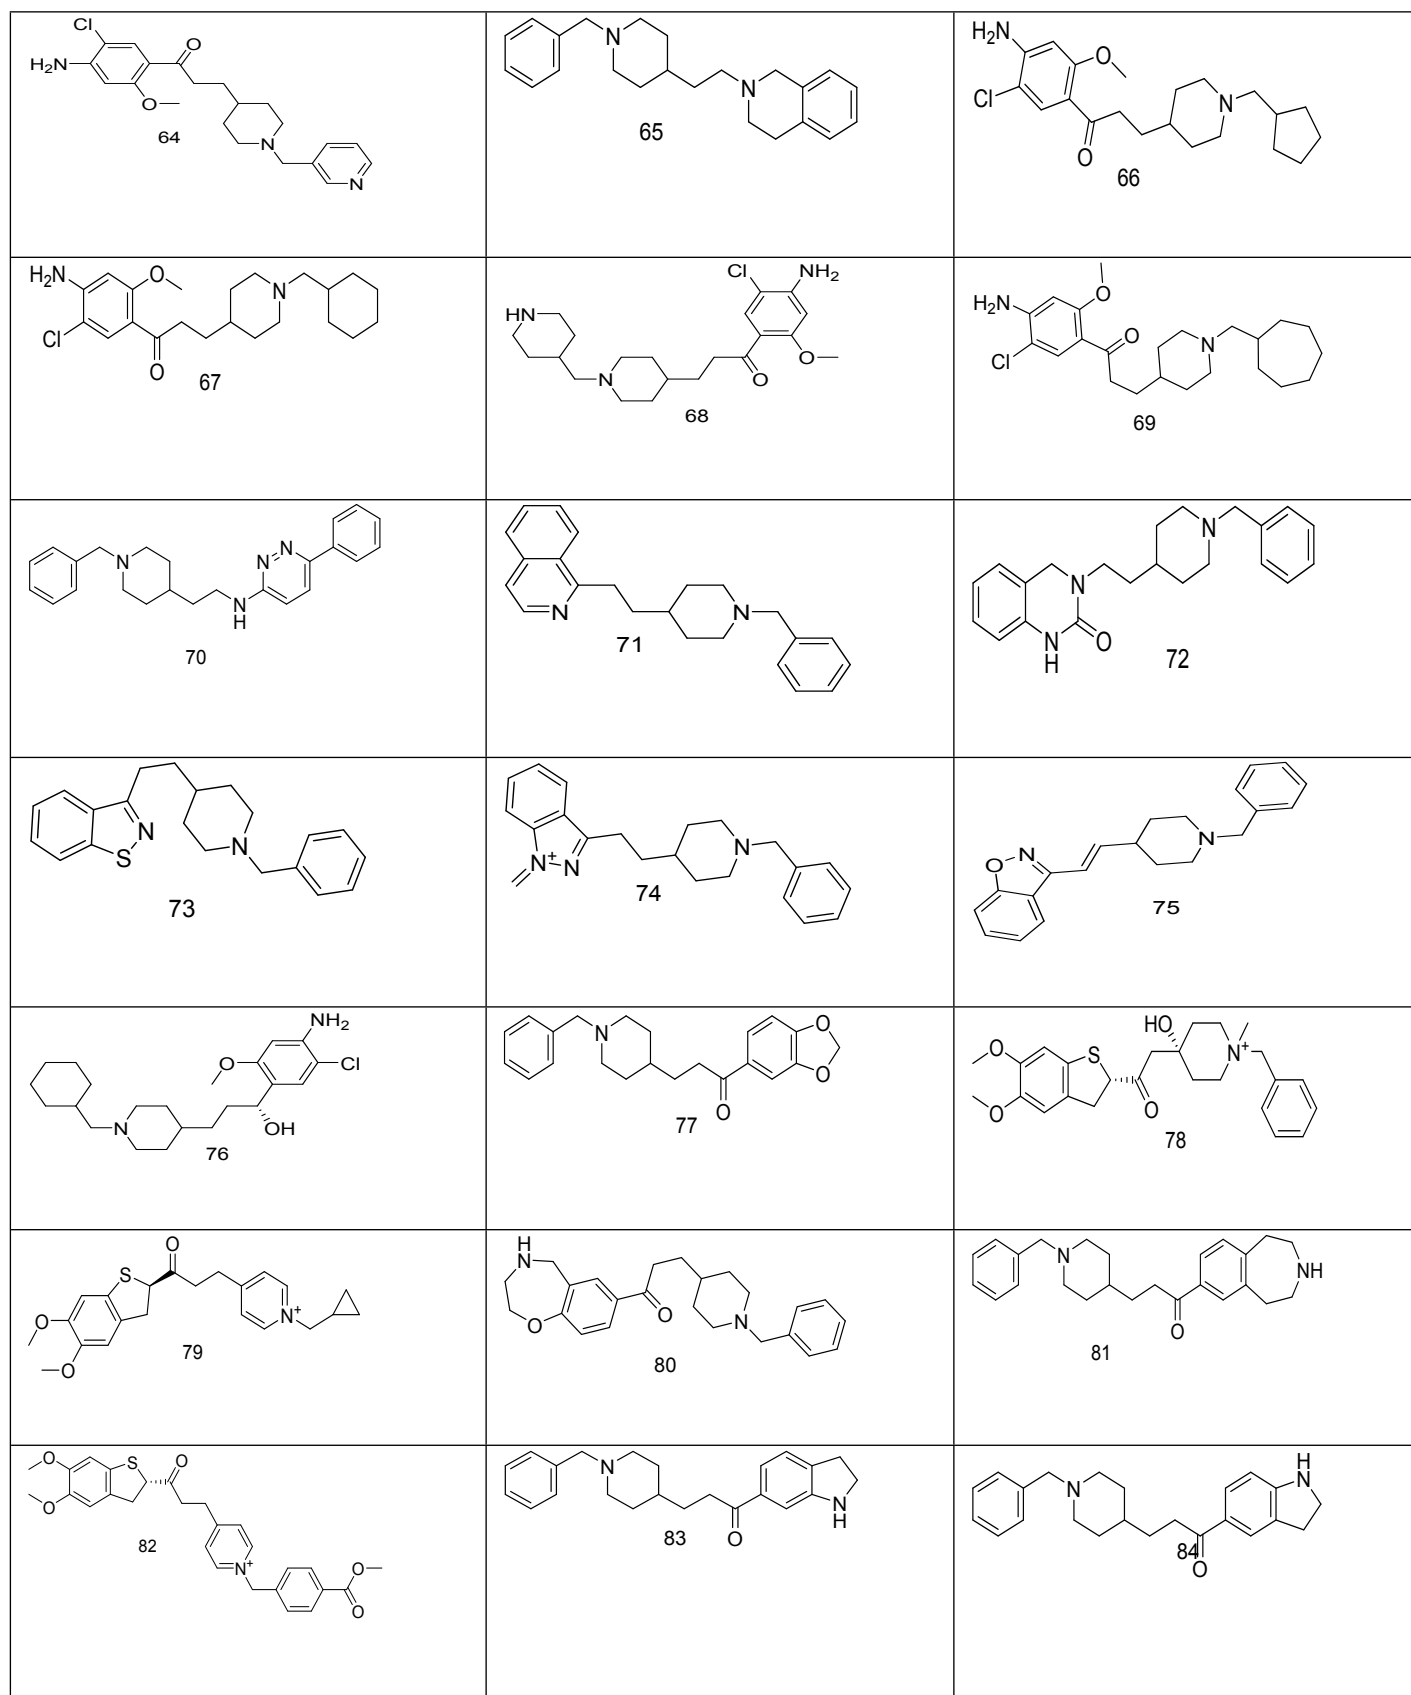

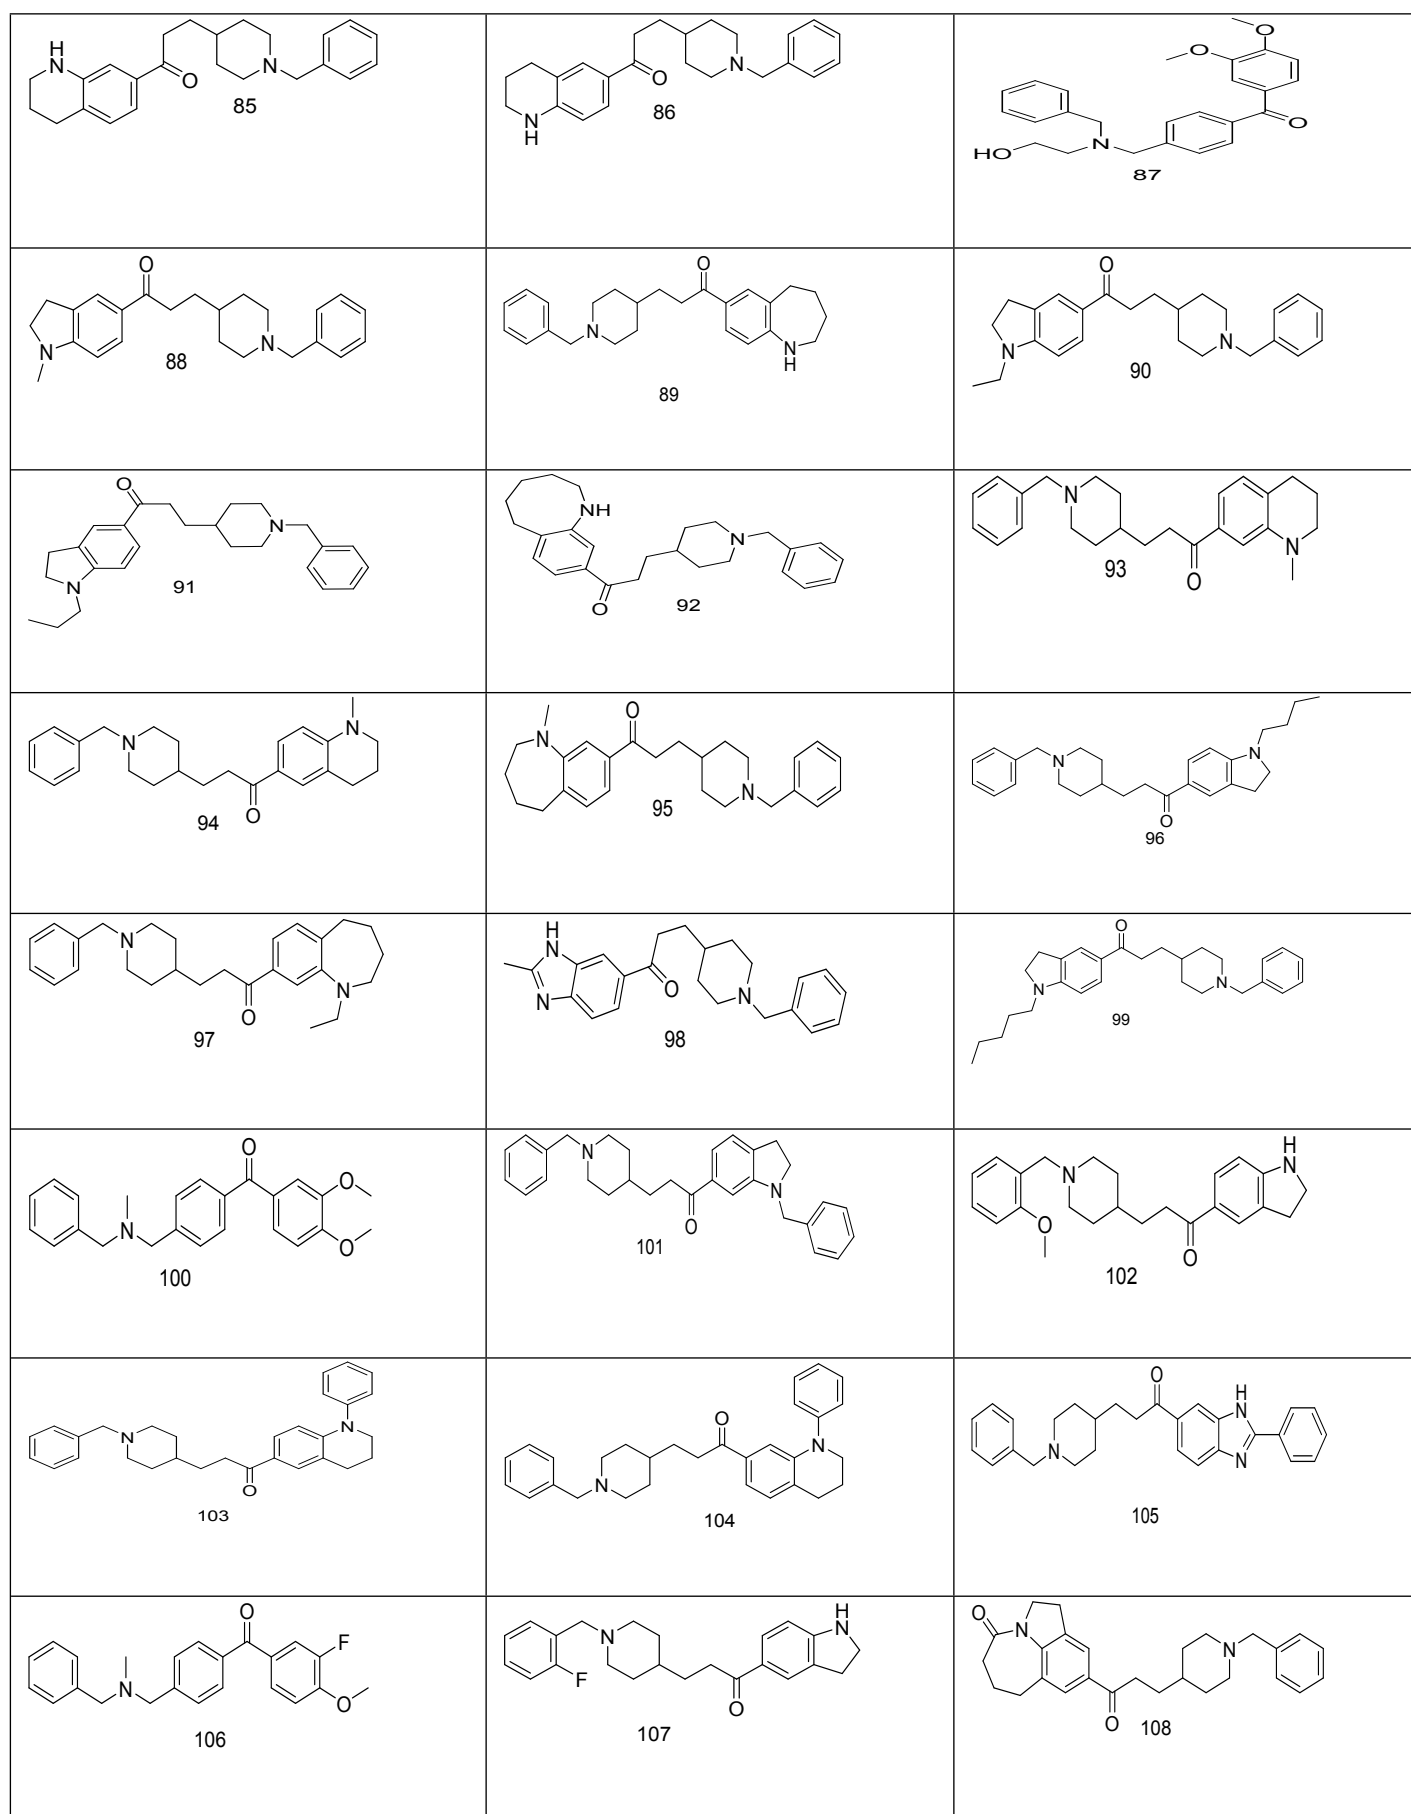

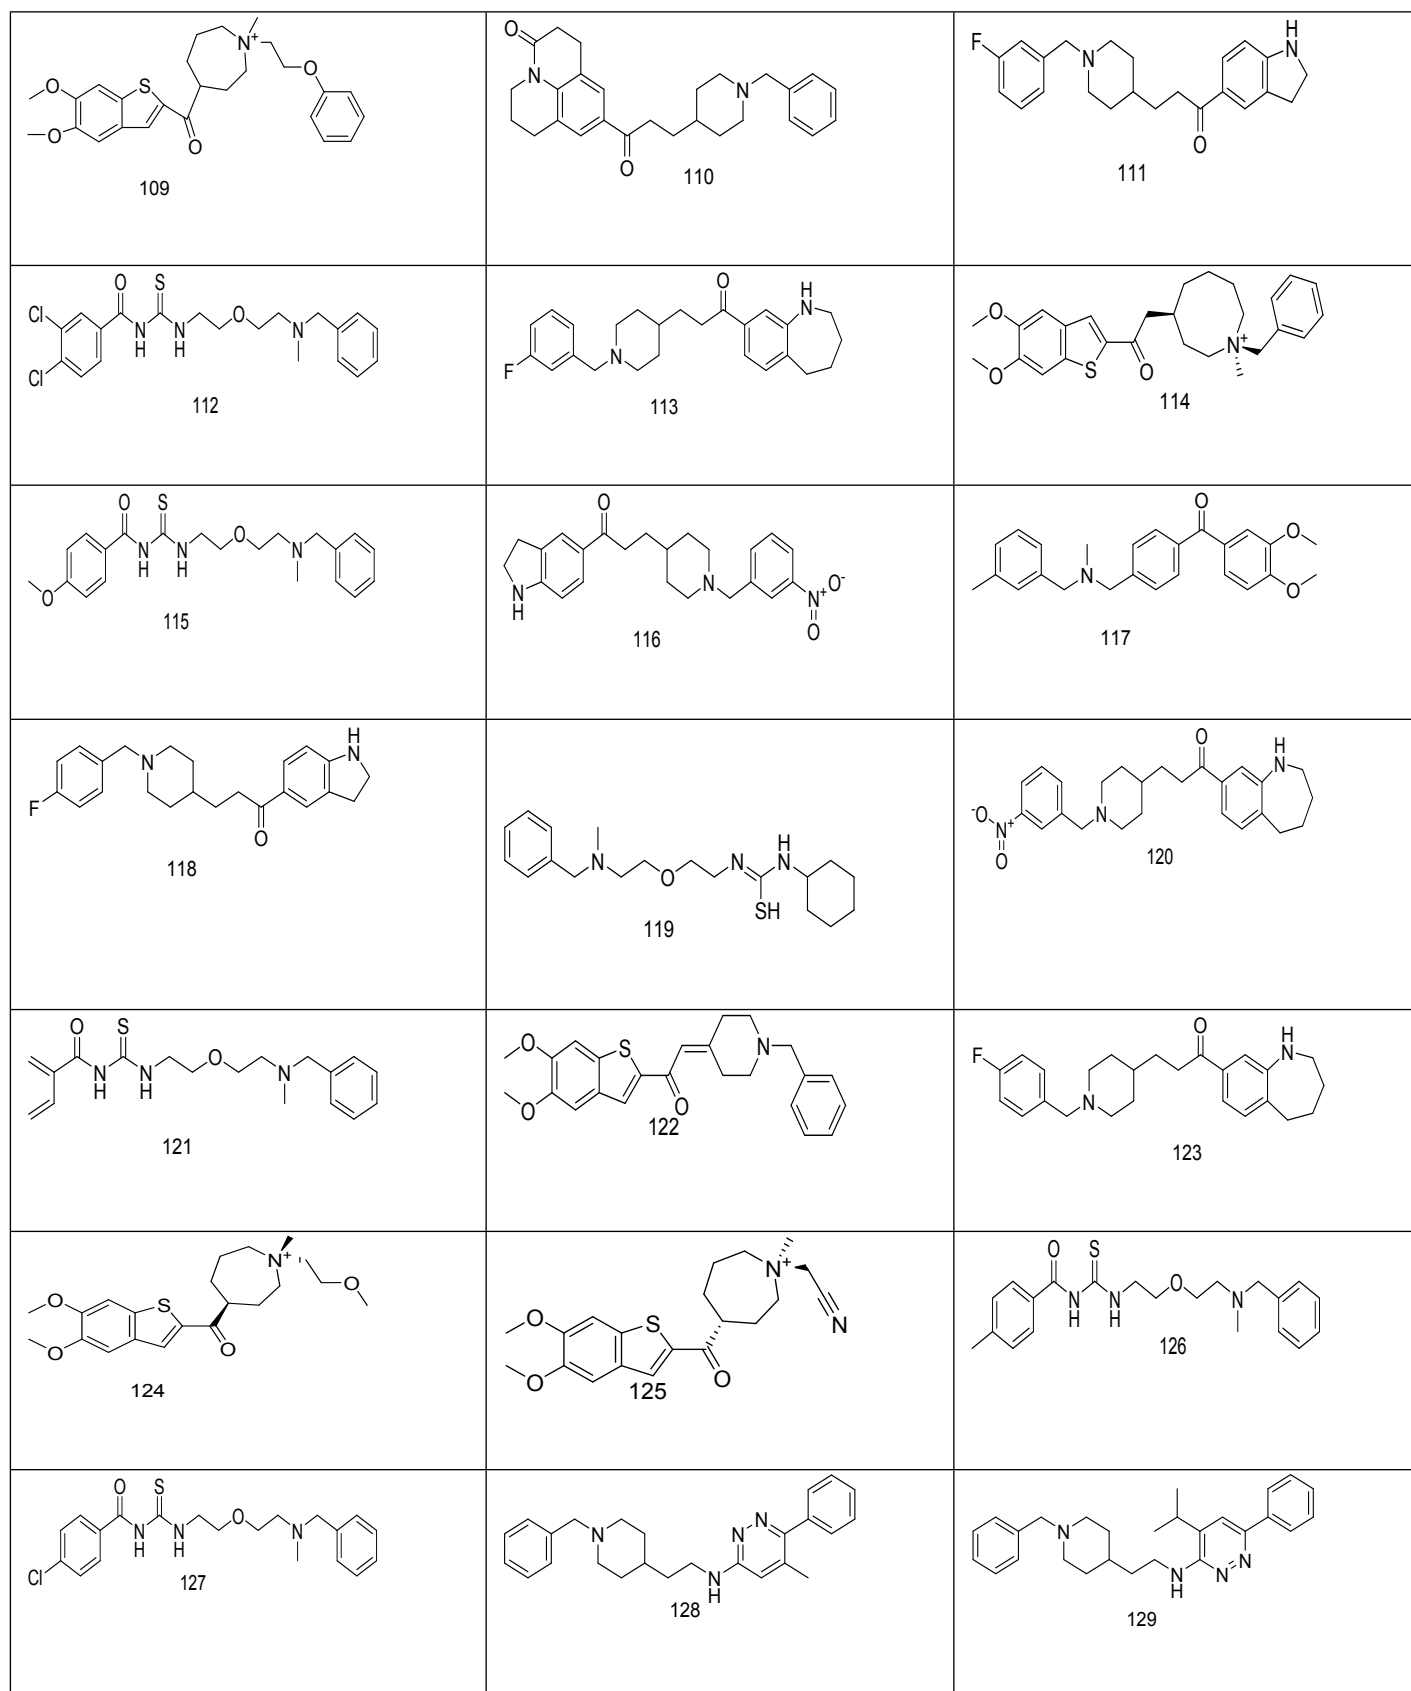

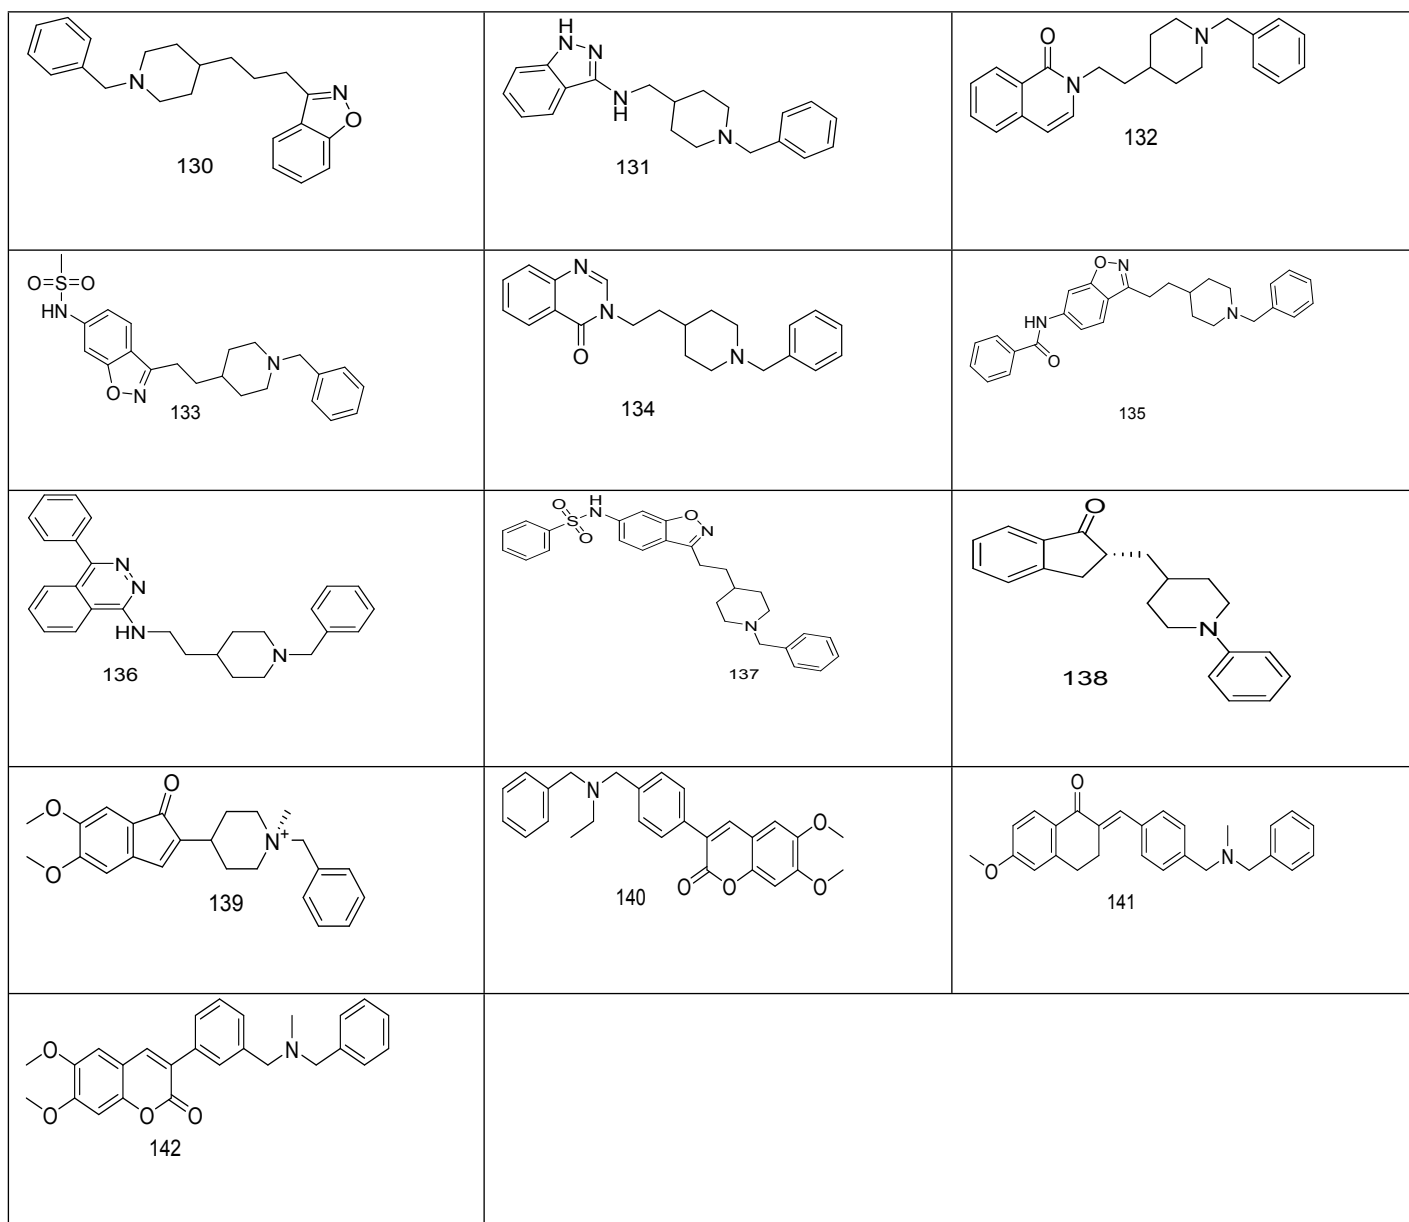

**Table S 7.** List of AChE inhibitors with observed and predicted pIC<sub>50</sub>, fitness, and errors

| Compound no. | Mol. Wt. | Canvas Similarity | Fitness | Phase QSAR set | pIC <sub>50</sub> | Predicted pIC <sub>50</sub> | Error |
|--------------|----------|-------------------|---------|----------------|-------------------|-----------------------------|-------|
| 1            | 433.558  | 0.155             | 1.365   | test           | 5.00              | 5.93                        | 0.93  |
| 2            | 322.411  | 0.134             | 2.078   | test           | 5.59              | 5.99                        | 0.40  |
| 3            | 467.573  | 0.125             | 1.986   | test           | 8.92              | 8.44                        | -0.48 |
| 4            | 426.581  | 0.153             | 1.503   | test           | 8.22              | 8.38                        | 0.16  |
| 5            | 350.465  | 0.146             | 2.915   | test           | 8.08              | 8.09                        | 0.01  |
| 6            | 348.492  | 0.14              | 3       | test           | 8.24              | 8.01                        | -0.23 |
| 7            | 363.463  | 0.139             | 2.787   | test           | 8.06              | 7.96                        | -0.10 |
| 8            | 377.491  | 0.124             | 2.805   | test           | 8.55              | 8.27                        | -0.28 |
| 9            | 300.448  | 0.162             | 2.106   | test           | 6.57              | 6.39                        | -0.18 |
| 10           | 348.449  | 0.161             | 2.12    | test           | 7.10              | 7.67                        | 0.57  |
| 11           | 428.579  | 0.161             | 1.869   | test           | 6.23              | 6.41                        | 0.18  |
| 12           | 354.472  | 0.16              | 1.996   | test           | 6.69              | 6.98                        | 0.29  |
| 13           | 354.472  | 0.151             | 2.105   | test           | 7.19              | 6.51                        | -0.68 |
| 14           | 416.543  | 0.151             | 1.699   | test           | 7.74              | 6.97                        | -0.77 |
| 15           | 360.466  | 0.144             | 1.456   | test           | 6.66              | 6.58                        | -0.08 |
| 16           | 387.913  | 0.195             | 1.561   | test           | 7.35              | 7.14                        | -0.21 |
| 17           | 393.961  | 0.146             | 1.793   | test           | 6.93              | 7.27                        | 0.34  |
| 18           | 407.001  | 0.146             | 1.674   | test           | 7.24              | 6.7                         | -0.54 |
| 19           | 336.503  | 0.133             | 2.85    | test           | 7.01              | 7.25                        | 0.24  |
| 20           | 318.422  | 0.123             | 1.541   | test           | 6.68              | 7.15                        | 0.47  |
| 21           | 376.547  | 0.156             | 1.88    | test           | 7.60              | 6.76                        | -0.84 |
| 22           | 362.519  | 0.151             | 2.167   | test           | 7.27              | 7.32                        | 0.05  |
| 23           | 362.519  | 0.149             | 0.83    | test           | 8.00              | 7.33                        | -0.67 |
| 24           | 390.574  | 0.146             | 0.67    | test           | 6.90              | 6.68                        | -0.22 |
| 25           | 376.547  | 0.146             | 1.515   | test           | 7.44              | 7.08                        | -0.36 |
| 26           | 390.574  | 0.144             | 1.085   | test           | 7.09              | 7.05                        | -0.04 |
| 27           | 375.472  | 0.136             | 1.569   | test           | 6.34              | 6.48                        | 0.14  |
| 28           | 438.618  | 0.129             | 1.053   | test           | 7.27              | 7.27                        | 0.00  |
| 29           | 363.436  | 0.122             | 1.758   | test           | 5.80              | 5.69                        | -0.11 |
| 30           | 366.483  | 0.117             | 0.961   | test           | 7.37              | 6.83                        | -0.54 |
| 31           | 454.613  | 0.113             | 1.295   | test           | 6.41              | 6.3                         | -0.11 |
| 32           | 416.568  | 0.113             | 1.845   | test           | 7.80              | 7.28                        | -0.52 |
| 33           | 401.532  | 0.108             | 1.516   | test           | 7.59              | 7.52                        | -0.07 |
| 34           | 366.483  | 0.105             | 2.167   | test           | 7.05              | 7.08                        | 0.03  |
| 35           | 421.544  | 0.103             | 2.088   | test           | 6.41              | 6.49                        | 0.08  |
| 36           | 422.571  | 0.102             | 1.952   | test           | 6.28              | 6.58                        | 0.30  |
| 37           | 394.537  | 0.101             | 1.872   | test           | 6.41              | 7.07                        | 0.66  |
| 38           | 405.95   | 0.1               | 1.758   | test           | 7.52              | 7.01                        | -0.51 |
| 39           | 386.545  | 0.144             | 2.122   | test           | 7.68              | 7.58                        | -0.10 |
| 40           | 320.441  | 0.128             | 2.078   | test           | 6.92              | 6.27                        | -0.65 |
| 41           | 305.424  | 0.286             | 1.772   | test           | 6.82              | 6.19                        | -0.63 |
| 42           | 378.496  | 0.144             | 1.243   | test           | 6.60              | 6.59                        | -0.01 |
| 43           | 404.601  | 0.153             | 1.686   | training       | 5.03              | 5.09                        | 0.06  |
| 44           | 408.51   | 0.121             | 1.75    | training       | 5.06              | 5.02                        | -0.04 |
| 45           | 420.557  | 0.115             | 1.942   | training       | 5.02              | 4.58                        | -0.44 |

|    |         |       |       |          |      |      |       |
|----|---------|-------|-------|----------|------|------|-------|
| 46 | 332.49  | 0.1   | 1.065 | training | 5.64 | 5.68 | 0.04  |
| 47 | 394.946 | 0.143 | 1.49  | training | 5.57 | 5.41 | -0.16 |
| 48 | 403.532 | 0.134 | 1.191 | training | 5.03 | 4.95 | -0.08 |
| 49 | 407.95  | 0.124 | 0.876 | training | 5.06 | 4.96 | -0.10 |
| 50 | 452.406 | 0.124 | 0.862 | training | 5.00 | 4.78 | -0.22 |
| 51 | 407.95  | 0.124 | 1.543 | training | 5.11 | 5.02 | -0.09 |
| 52 | 482.669 | 0.122 | 1.698 | training | 5.02 | 5.22 | 0.20  |
| 53 | 466.67  | 0.106 | 1.699 | training | 5.67 | 5.48 | -0.19 |
| 54 | 432.568 | 0.148 | 0.803 | training | 5.06 | 5.02 | -0.04 |
| 55 | 401.51  | 0.131 | 1.197 | training | 5.68 | 5.74 | 0.06  |
| 56 | 406.573 | 0.126 | 2.111 | training | 5.58 | 5.86 | 0.28  |
| 57 | 378.519 | 0.125 | 2.156 | training | 5.57 | 6.13 | 0.56  |
| 58 | 356.469 | 0.113 | 1.076 | training | 5.63 | 5.6  | -0.03 |
| 59 | 345.445 | 0.1   | 1.76  | training | 5.74 | 5.72 | -0.02 |
| 60 | 319.451 | 0.176 | 1.229 | training | 5.68 | 5.56 | -0.12 |
| 61 | 378.475 | 0.176 | 2.06  | training | 8.10 | 7.66 | -0.44 |
| 62 | 443.55  | 0.144 | 1.951 | training | 8.27 | 8.16 | -0.11 |
| 63 | 452.558 | 0.132 | 1.965 | training | 8.62 | 8.8  | 0.18  |
| 64 | 393.446 | 0.127 | 2.121 | training | 8.05 | 8.14 | 0.09  |
| 65 | 420.555 | 0.178 | 1.551 | training | 8.34 | 8.5  | 0.16  |
| 66 | 370.494 | 0.164 | 1.625 | training | 8.20 | 8.25 | 0.05  |
| 67 | 438.545 | 0.155 | 1.693 | training | 8.59 | 8.38 | -0.21 |
| 68 | 378.54  | 0.143 | 1.43  | training | 8.17 | 8.2  | 0.03  |
| 69 | 455.514 | 0.142 | 1.537 | training | 8.35 | 8.42 | 0.07  |
| 70 | 389.545 | 0.132 | 1.367 | training | 8.37 | 8.72 | 0.35  |
| 71 | 402.541 | 0.11  | 2.127 | training | 8.44 | 7.92 | -0.52 |
| 72 | 350.465 | 0.138 | 2.757 | training | 8.15 | 7.92 | -0.23 |
| 73 | 397.908 | 0.117 | 1.875 | training | 8.35 | 7.96 | -0.39 |
| 74 | 402.585 | 0.116 | 2.71  | training | 9.10 | 8.59 | -0.51 |
| 75 | 375.475 | 0.116 | 2.825 | training | 9.02 | 8.56 | -0.46 |
| 76 | 389.502 | 0.115 | 2.892 | training | 9.24 | 9.02 | -0.22 |
| 77 | 405.545 | 0.114 | 2.732 | training | 9.10 | 8.75 | -0.35 |
| 78 | 379.504 | 1     | 1.774 | training | 8.24 | 8.18 | -0.06 |
| 79 | 336.481 | 0.166 | 2.005 | training | 7.28 | 6.89 | -0.39 |
| 80 | 337.469 | 0.162 | 2.006 | training | 6.97 | 6.97 | 0.00  |
| 81 | 307.44  | 0.179 | 2.188 | training | 6.52 | 6.35 | -0.17 |
| 82 | 366.508 | 0.161 | 1.952 | training | 7.34 | 7.22 | -0.12 |
| 83 | 348.492 | 0.153 | 1.923 | training | 6.00 | 6.07 | 0.07  |
| 84 | 374.493 | 0.144 | 1.987 | training | 8.03 | 8.21 | 0.18  |
| 85 | 349.48  | 0.142 | 1.988 | training | 6.10 | 6.17 | 0.07  |
| 86 | 349.436 | 0.137 | 1.778 | training | 7.89 | 7.98 | 0.09  |
| 87 | 464.619 | 0.126 | 0.889 | training | 6.92 | 7.04 | 0.12  |
| 88 | 443.638 | 0.125 | 0.73  | training | 6.42 | 6.51 | 0.09  |
| 89 | 360.544 | 0.103 | 1.355 | training | 6.46 | 6.45 | -0.01 |
| 90 | 423.473 | 0.101 | 2.046 | training | 6.36 | 6.5  | 0.14  |
| 91 | 334.509 | 0.151 | 1.958 | training | 5.80 | 5.96 | 0.16  |
| 92 | 378.946 | 0.147 | 1.665 | training | 7.16 | 7.28 | 0.12  |



|     |         |       |       |          |      |      |       |
|-----|---------|-------|-------|----------|------|------|-------|
| 93  | 392.974 | 0.146 | 1.677 | training | 7.80 | 7.61 | -0.19 |
| 94  | 372.518 | 0.139 | 1.738 | training | 6.92 | 6.63 | -0.29 |
| 95  | 330.477 | 0.137 | 2.686 | training | 6.66 | 6.78 | 0.12  |
| 96  | 349.48  | 0.136 | 1.707 | training | 7.89 | 8.04 | 0.15  |
| 97  | 332.473 | 0.128 | 1.863 | training | 6.47 | 6.3  | -0.17 |
| 98  | 394.989 | 0.103 | 1.767 | training | 5.99 | 5.95 | -0.04 |
| 99  | 351.449 | 0.172 | 2.176 | training | 7.52 | 7.02 | -0.50 |
| 100 | 442.602 | 0.169 | 1.624 | training | 7.05 | 7.1  | 0.05  |
| 101 | 384.521 | 0.163 | 1.653 | training | 6.96 | 7.14 | 0.18  |
| 102 | 378.519 | 0.161 | 2.145 | training | 7.40 | 7.3  | -0.10 |
| 103 | 478.592 | 0.155 | 1.69  | training | 6.00 | 5.83 | -0.17 |
| 104 | 348.492 | 0.154 | 2.187 | training | 6.95 | 6.79 | -0.16 |
| 105 | 348.492 | 0.154 | 0.732 | training | 7.28 | 6.89 | -0.39 |
| 106 | 362.519 | 0.151 | 2.167 | training | 6.79 | 6.8  | 0.01  |
| 107 | 405.498 | 0.149 | 1.696 | training | 5.85 | 6.05 | 0.20  |
| 108 | 376.547 | 0.148 | 2.14  | training | 6.90 | 7.06 | 0.16  |
| 109 | 376.547 | 0.148 | 0.757 | training | 7.96 | 8.06 | 0.10  |
| 110 | 390.574 | 0.147 | 1.057 | training | 7.66 | 7.49 | -0.17 |
| 111 | 376.547 | 0.146 | 0.524 | training | 7.62 | 7.67 | 0.05  |
| 112 | 404.601 | 0.144 | 0.354 | training | 7.54 | 7.31 | -0.23 |
| 113 | 404.601 | 0.143 | 0.348 | training | 6.42 | 6.39 | -0.03 |
| 114 | 361.491 | 0.143 | 2.112 | training | 7.92 | 7.6  | -0.32 |
| 115 | 418.628 | 0.141 | 1.102 | training | 7.33 | 7.33 | 0.00  |
| 116 | 438.618 | 0.135 | 0.084 | training | 6.07 | 5.64 | -0.43 |
| 117 | 378.519 | 0.131 | 0.79  | training | 6.09 | 6.41 | 0.32  |
| 118 | 438.618 | 0.128 | 2.025 | training | 5.83 | 5.93 | 0.10  |
| 119 | 423.563 | 0.123 | 1.815 | training | 7.48 | 7.85 | 0.37  |
| 120 | 416.568 | 0.113 | 0.045 | training | 7.28 | 7.02 | -0.26 |
| 121 | 366.483 | 0.111 | 1.929 | training | 7.80 | 7.7  | -0.10 |
| 122 | 440.395 | 0.111 | 1.738 | training | 7.26 | 7.16 | -0.10 |
| 123 | 394.537 | 0.108 | 2.116 | training | 6.84 | 6.63 | -0.21 |
| 124 | 452.641 | 0.108 | 0.855 | training | 6.96 | 6.88 | -0.08 |
| 125 | 393.49  | 0.106 | 2.13  | training | 7.19 | 6.81 | -0.38 |
| 126 | 389.499 | 0.105 | 1.754 | training | 5.78 | 5.71 | -0.07 |
| 127 | 349.542 | 0.103 | 1.569 | training | 5.85 | 5.73 | -0.12 |
| 128 | 371.505 | 0.103 | 1.007 | training | 6.92 | 7.08 | 0.16  |
| 129 | 392.542 | 0.101 | 1.578 | training | 7.28 | 7.18 | -0.10 |
| 130 | 373.498 | 0.1   | 1.616 | training | 6.00 | 5.78 | -0.22 |
| 131 | 385.532 | 0.1   | 1.525 | training | 7.11 | 7.11 | 0.00  |
| 132 | 414.599 | 0.139 | 1.986 | training | 6.37 | 6.4  | 0.03  |
| 133 | 334.465 | 0.133 | 1.777 | training | 6.05 | 5.88 | -0.17 |
| 134 | 346.476 | 0.128 | 2.302 | training | 5.96 | 6.24 | 0.28  |
| 135 | 413.543 | 0.122 | 2.735 | training | 7.85 | 8.02 | 0.17  |
| 136 | 347.464 | 0.122 | 2.27  | training | 5.92 | 6.39 | 0.47  |
| 137 | 439.562 | 0.119 | 2.669 | training | 8.03 | 8.23 | 0.20  |
| 138 | 422.578 | 0.117 | 1.667 | training | 6.36 | 6.19 | -0.17 |
| 139 | 475.614 | 0.111 | 2.669 | training | 7.85 | 7.88 | 0.03  |
| 140 | 429.521 | 0.11  | 1.217 | training | 7.74 | 7.95 | 0.21  |

|     |         |       |       |          |      |      |       |
|-----|---------|-------|-------|----------|------|------|-------|
| 141 | 397.522 | 0.105 | 1.087 | training | 6.96 | 6.94 | -0.02 |
| 142 | 415.493 | 0.101 | 1.916 | training | 6.69 | 6.86 | 0.17  |

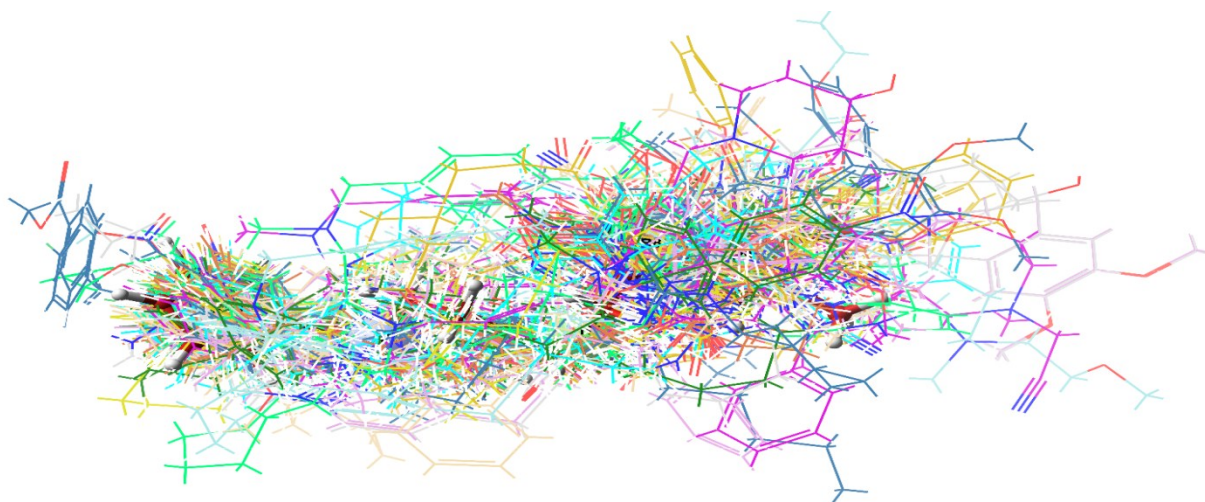

**Figure S10.** Alignment of all 142 AChE inhibitors with developed Pharmacophore hypothesis
